# Supplementary material for: Hip Fracture Risk Assessment Tools for Adults Aged 80 Years and Older
Source: PubMed Central journal article supplement (PMC11214124; doi:10.1001/jamanetworkopen.2024.18612), 2024-06-28
Supplement: jamanetwopen-e2418612-s001.pdf [file jamanetwopen-e2418612-s001.pdf]

## Supplemental Online Content

Ensrud KE, Schousboe JT, Crandall CJ, et al. Hip fracture risk assessment tools for adults aged 80 years and older. *JAMA Netw Open*. 2024;7(6):e2418612. doi:10.1001/jamanetworkopen.2024.18612

**eTable 1.** Cohort Study Information

**eTable 2.** Characteristics of Women by Cohort

**eTable 3.** Characteristics of Men by Cohort

**eFigure 1.** Participant Flow Diagram

**eFigure 2.** Observed vs Predicted 5-Year Absolute Probability of Hip Fracture Stratified by Quintile of Predicted Risk for the Garvan tool in Women and Men

This supplemental material has been provided by the authors to give readers additional information about their work.

**eTable 1. Cohort Study Information**

| Cohort <sup>a</sup> | Demographics                                                                 | Geographic Region                                                                                        | Eligibility Criteria                                                                                                       | Baseline Exam                                  | Index Exam <sup>b</sup>                                                             |
|---------------------|------------------------------------------------------------------------------|----------------------------------------------------------------------------------------------------------|----------------------------------------------------------------------------------------------------------------------------|------------------------------------------------|-------------------------------------------------------------------------------------|
| SOF                 | 9,704 community-dwelling white women, and 662 community-dwelling black women | 4 US sites (Baltimore, MD; Minneapolis, MN; Pittsburgh, PA; Portland, OR)                                | Women age 65 and older, ability to walk without the assistance of another person, and absence of bilateral hip replacement | 1986-1988 white cohort; 1997-1998 black cohort | Year 10 (1997-1998) or Year 16 (2002-2004)                                          |
| MrOS                | 5,994 community-dwelling men                                                 | 6 US sites (Birmingham, AL; Minneapolis, MN; Palo Alto, CA; Pittsburgh, PA; Portland, OR; San Diego, CA) | Men age 65 and older, ability to walk without the assistance of another person, and absence of bilateral hip replacement   | 2000-2002                                      | Year 5 (2005-2007), Year 7 (2007-2009) or Year 14 (2014-2016)                       |
| Health ABC          | 3,075 black and white community-dwelling men and women                       | 2 US sites (Memphis, TN and Pittsburgh, PA)                                                              | Age 70-79 with no self-report of mobility difficulty or mobility disability                                                | 1997-1998                                      | Year 3 (1999-2000), Year 5/6 (2002-2003), Year 8 (2004-2005) or Year 10 (2006-2007) |

Study acronyms: SOF, Study of Osteoporotic Fractures; MrOS, Osteoporotic Fractures in Men Study; Health ABC, Health, Aging and Body Composition Study

<sup>a</sup>Institutional review boards at each participating site reviewed and approved the four cohort studies; all participants provided written informed consent

<sup>b</sup>Participants counted only once and included in analytical cohort at index examination when they first reached age  $\geq 80$  years

**eTable 2. Characteristics of Women by Cohort**

| Characteristic                                                                       | Women           |                       |
|--------------------------------------------------------------------------------------|-----------------|-----------------------|
|                                                                                      | SOF<br>(n=4101) | Health ABC<br>(n=805) |
| Age, years, mean (SD)                                                                | 82.9 (2.9)      | 81.2 (0.9)            |
| Race/ethnicity, n (%)                                                                |                 |                       |
| Black                                                                                | 235 (5.7)       | 310 (38.5)            |
| White                                                                                | 3,866 (94.3)    | 495 (61.5)            |
| Weight, kg, mean (SD)                                                                | 65.0 (12.4)     | 67.5 (13.8)           |
| Body mass index, kg/m <sup>2</sup> , mean (SD)                                       | 26.5 (4.7)      | 27.1 (5.3)            |
| Number of fractures since age 50, n (%)                                              |                 |                       |
| 0                                                                                    | 1,904 (46.4)    | 509 (63.2)            |
| 1                                                                                    | 725 (17.7)      | 249 (30.9)            |
| 2                                                                                    | 910 (22.2)      | 40 (5.0)              |
| ≥3                                                                                   | 562 (13.7)      | 7 (0.9)               |
| Number of falls in past year, n (%)                                                  |                 |                       |
| 0                                                                                    | 2,691 (65.6)    | 566 (70.3)            |
| 1                                                                                    | 814 (19.8)      | 142 (17.6)            |
| 2                                                                                    | 315 (7.7)       | 76 (9.4)              |
| ≥3                                                                                   | 281 (6.9)       | 21 (2.6)              |
| Parent fractured hip, n (%) <sup>a</sup>                                             | 494 (12.0)      | 0 (0)                 |
| Current smoker, n (%)                                                                | 113 (2.8)       | 39 (4.8)              |
| Oral glucocorticoid use, n (%)                                                       | 137 (3.3)       | 28 (3.5)              |
| Rheumatoid arthritis, n (%)                                                          | 592 (14.4)      | 5 (0.6)               |
| Alcohol intake ≥3 drinks/day, n (%)                                                  | 37 (0.9)        | 1 (0.1)               |
| Bisphosphonate use, n (%)                                                            | 170 (5.3)       | 4 (0.5)               |
| Femoral neck BMD T-score <sup>b</sup> , mean (SD)                                    | -2.0 (1.0)      | -1.6 (1.0)            |
| 5-year probability (%) of hip fracture from FRAX w/BMD model, mean (SD) <sup>a</sup> | 4.8 (4.9)       | 2.2 (2.1)             |
| 5-year probability (%) of hip fracture from Garvan w/BMD model, mean (SD)            | 18.7 (22.3)     | 6.9 (9.4)             |
| 5-year probability (%) of hip fracture from femoral neck BMD, mean (SD)              | 7.0 (5.4)       | 5.2 (4.3)             |

Abbreviations: BMD, bone mineral density; SD, standard deviation

<sup>a</sup>assuming no parental history of hip fracture for all Health ABC participants

<sup>b</sup>BMD T-scores were calculated using the National Health and Nutrition Examination Survey young white female reference database

**eTable 3. Characteristics of Men by Cohort**

| Characteristic                                                                       | Men              |                       |
|--------------------------------------------------------------------------------------|------------------|-----------------------|
|                                                                                      | MrOS<br>(n=3205) | Health ABC<br>(n=779) |
| Age, years, mean (SD)                                                                | 83.0 (2.9)       | 81.3 (1.0)            |
| Race/ethnicity, n (%)                                                                |                  |                       |
| Black                                                                                | 77 (2.4)         | 244 (31.3)            |
| White                                                                                | 2,940 (91.7)     | 535 (68.7)            |
| Other <sup>a</sup>                                                                   | 188 (5.9)        | 0 (0)                 |
| Weight, kg, mean (SD)                                                                | 79.4 (12.5)      | 79.3 (13.2)           |
| Body mass index, kg/m <sup>2</sup> , mean (SD)                                       | 26.8 (3.7)       | 26.9 (4.0)            |
| Number of fractures since age 50, n (%)                                              |                  |                       |
| 0                                                                                    | 2,242 (70.0)     | 607 (77.9)            |
| 1                                                                                    | 626 (19.5)       | 165 (21.2)            |
| 2                                                                                    | 207 (6.5)        | 7 (0.9)               |
| ≥3                                                                                   | 130 (4.1)        | 0 (0)                 |
| Number of falls in past year, n (%)                                                  |                  |                       |
| 0                                                                                    | 2,072 (64.6)     | 555 (71.2)            |
| 1                                                                                    | 575 (17.9)       | 128 (16.4)            |
| 2                                                                                    | 427 (13.3)       | 72 (9.2)              |
| ≥3                                                                                   | 131 (4.1)        | 24 (3.1)              |
| Parent fractured hip, n (%) <sup>b</sup>                                             | 431 (13.4)       | 0 (0)                 |
| Current smoker, n (%)                                                                | 38 (1.2)         | 36 (4.6)              |
| Oral glucocorticoid use, n (%)                                                       | 89 (2.8)         | 19 (2.4)              |
| Rheumatoid arthritis, n (%)                                                          | 210 (6.6)        | 3 (0.4)               |
| Alcohol intake ≥3 drinks/day, n (%)                                                  | 132 (4.1)        | 13 (1.7)              |
| Bisphosphonate use, n (%)                                                            | 170 (5.3)        | 4 (0.5)               |
| Femoral neck BMD T-score <sup>c</sup> , mean (SD)                                    | -0.9 (1.1)       | -0.8 (1.2)            |
| 5-year probability (%) of hip fracture from FRAX w/BMD model, mean (SD) <sup>b</sup> | 2.2 (2.4)        | 1.2 (1.0)             |
| 5-year probability (%) of hip fracture from Garvan w/BMD model, mean (SD)            | 6.1 (9.6)        | 3.6 (5.1)             |
| 5-year probability (%) of hip fracture from femoral neck BMD, mean (SD)              | 3.1 (3.4)        | 3.1 (3.5)             |

Abbreviations: BMD, bone mineral density; SD, standard deviation

<sup>a</sup>Asian, Hispanic, Latino, Native American or Hawaiian/Pacific Islander

<sup>b</sup>assuming no parental history of hip fracture for all Health ABC participants

<sup>c</sup>BMD T-scores were calculated using the National Health and Nutrition Examination Survey young white female reference database

**eFigure 1. Participant Flow Diagram**

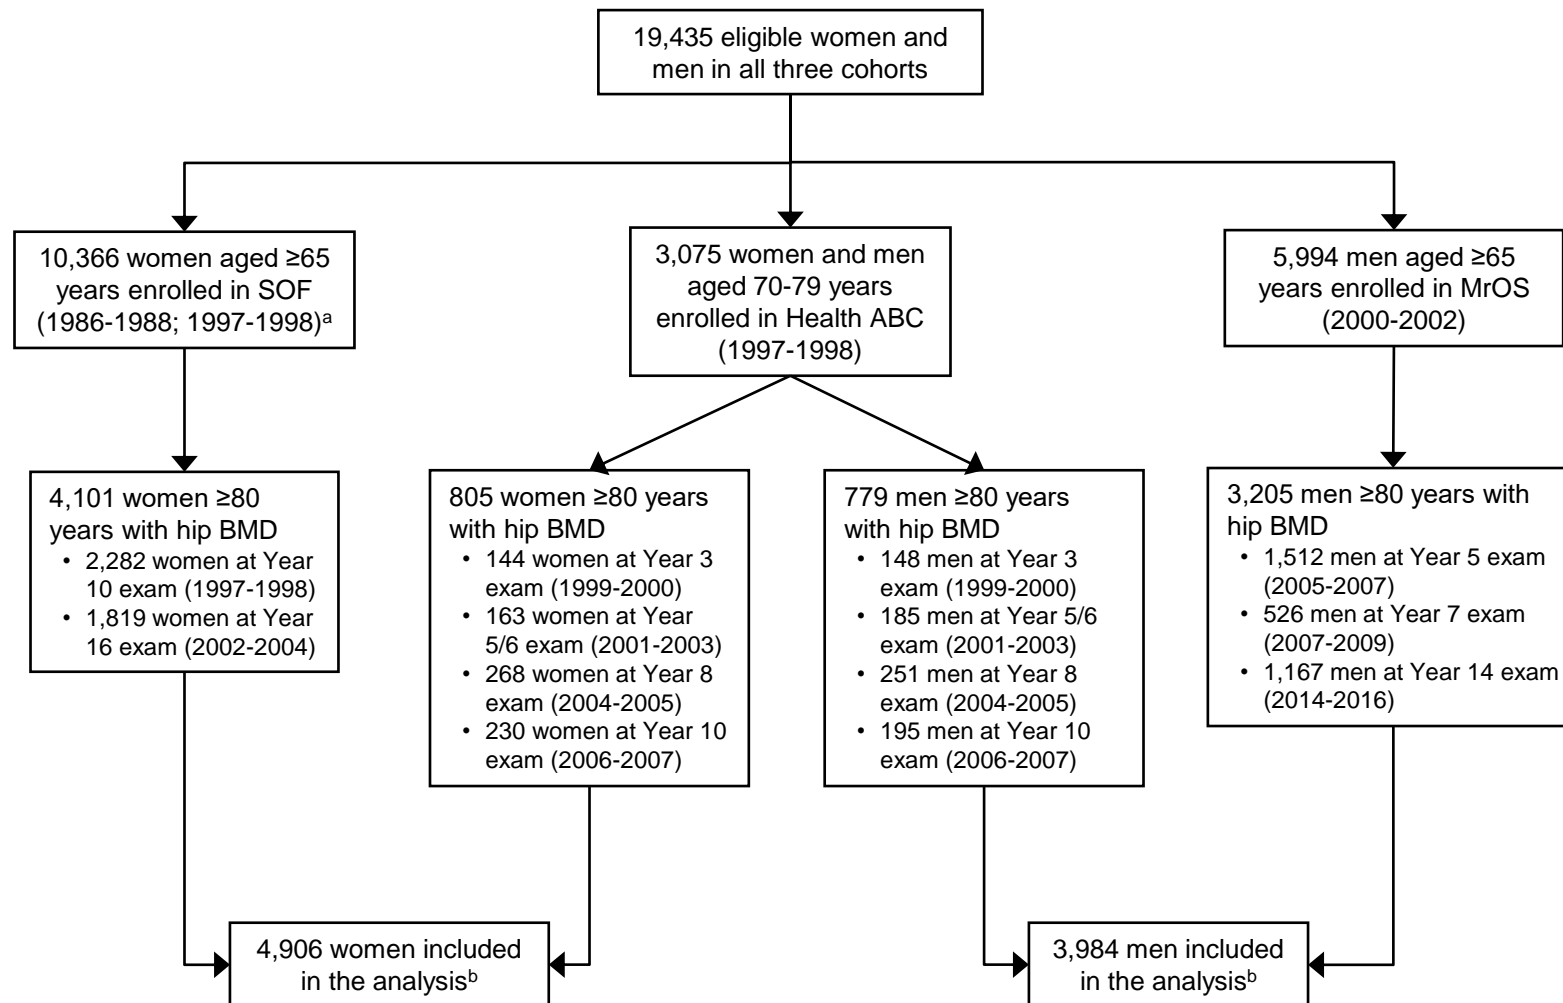

<sup>a</sup>9,704 community-dwelling white women were enrolled from 1986-1988, and 662 community-dwelling black women were enrolled from 1997-1998

<sup>b</sup>Participants counted only once and included in analytical cohort at index examination when they first reached age ≥80 years

**eFigure 2. Observed<sup>a</sup> vs Predicted 5-Year Absolute Probability of Hip Fracture Stratified by Quintile of Predicted Risk for the Garvan tool in Women and Men**

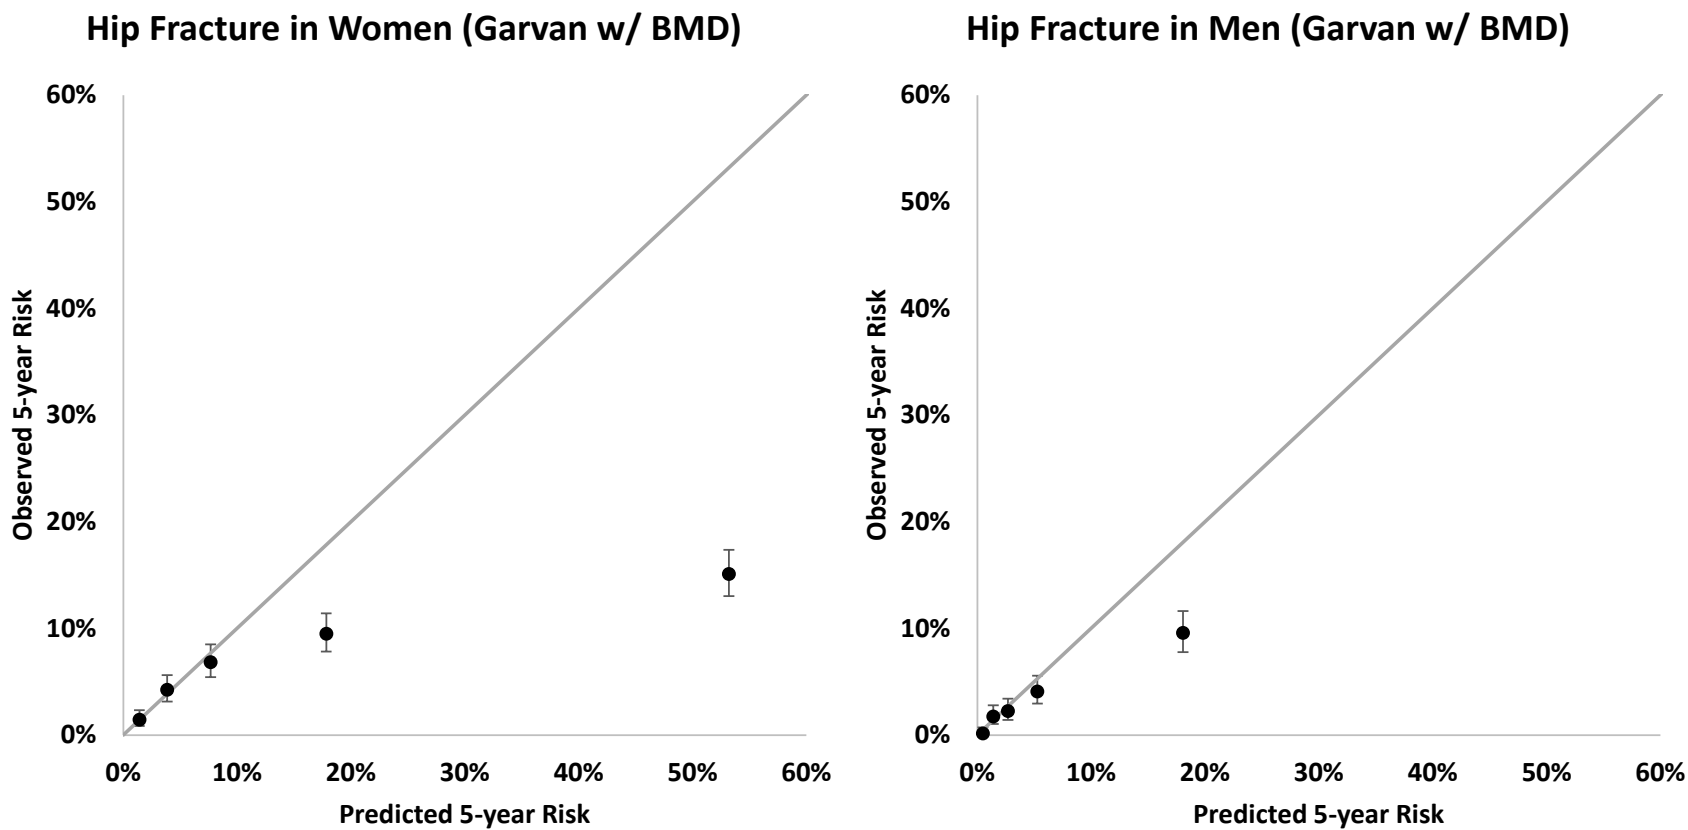

<sup>a</sup>observed probability of hip fracture was calculated using Kaplan-Meier method
