# Supplementary material for: Hip Fracture Risk Assessment Tools for Adults Aged 80 Years and Older
Source: PubMed Central journal article supplement (PMC11214124; doi:10.1001/jamanetworkopen.2024.18612), 2024-06-28
Supplement: jamanetwopen-e2418612-s002.pdf [file jamanetwopen-e2418612-s002.pdf]

## Data Sharing Statement

Ensrud. Hip Fracture Risk Assessment Tools for Adults Aged 80 Years and Older. *JAMA Netw Open*. Published June 26, 2024. doi:10.1001/jamanetworkopen.2024.18612

### Data

**Data available:** Yes

**Data types:** Deidentified participant data, Data dictionary

**How to access data:** SOF data is available to the public via the 'SOF Online' website (<https://sofonline.ucsf.edu/>). MrOS data is available to the public via the 'MrOS Online' website (<https://mrosonline.ucsf.edu/>). Health ABC data is available to the public via the 'Health ABC Study' website (<https://healthabc.nia.nih.gov/>).

**When available:** With publication

### Supporting Documents

**Document types:** None

### Additional Information

**Who can access the data:** Anyone

**Types of analyses:** For any purpose

**Mechanisms of data availability:** registered account with data use agreement
